# Supplementary material
Source: Research Square preprint supplement (doi:10.21203/rs.3.rs-8498540/v1)
Supplement: Supplementary file 1 [file 59ea20cdff1dae130ac94e01.docx]

Study Title: Experience of COVID-19 Response in Addis Ababa City Administration, Ethiopia

Purpose: To explore implementation experiences, challenges, adaptations, and lessons learned from the COVID-19 response, aligned with WHO emergency response pillars.

Semi-Structured Interview Guide

| Response Pillar | Domain | Key Interview Questions |
| --- | --- | --- |
| Leadership & Coordination (IMS/EOC) | Governance | 1. What was your role in the COVID-19 response? 2. How did the IMS/EOC support coordination and decision-making? 3. What governance challenges and adaptations occurred during peak transmission? |
| Surveillance | Surveillance & Contact Tracing | 4. How were surveillance and contact tracing implemented initially? 5. How did these strategies evolve over time? 6. What contextual or community challenges affected surveillance activities? |
| Laboratory Services | Testing & Diagnostics | 7. How was laboratory capacity expanded during the response? 8. What were the main laboratory constraints and how were they addressed? |
| Logistics & Supply Chain | Supply Management | 9. How were essential supplies mobilized and distributed? 10. What strategies were used to manage supply shortages? |
| Case Management & IPC | Clinical Care & Workforce | 11. How did case management and IPC strategies evolve? 12. What was your experience with home-based isolation and care? 13. How did the response affect health worker wellbeing? |
| Risk Communication & Community Engagement | RCCE | 14. How were RCCE strategies implemented? 15. How did communities respond to public health messaging? 16. What approaches were most effective in addressing misinformation? |
| Vaccination | Vaccine Delivery & Equity | 17. How was COVID-19 vaccination implemented in Addis Ababa? 18. What strategies improved access and uptake among high-risk or hard-to-reach populations? |
| Cross-cutting | Ethics & Equity | 19. What ethical or equity-related challenges were encountered during the response? |
| Preparedness & Lessons Learned | Future Preparedness | 20. What key lessons should inform future public health emergency preparedness? |
